# Supplementary material
Source: MDPI journal article supplement (https://www.mdpi.com/2072-4292/13/2/159)
Supplement: s1 [file s1]

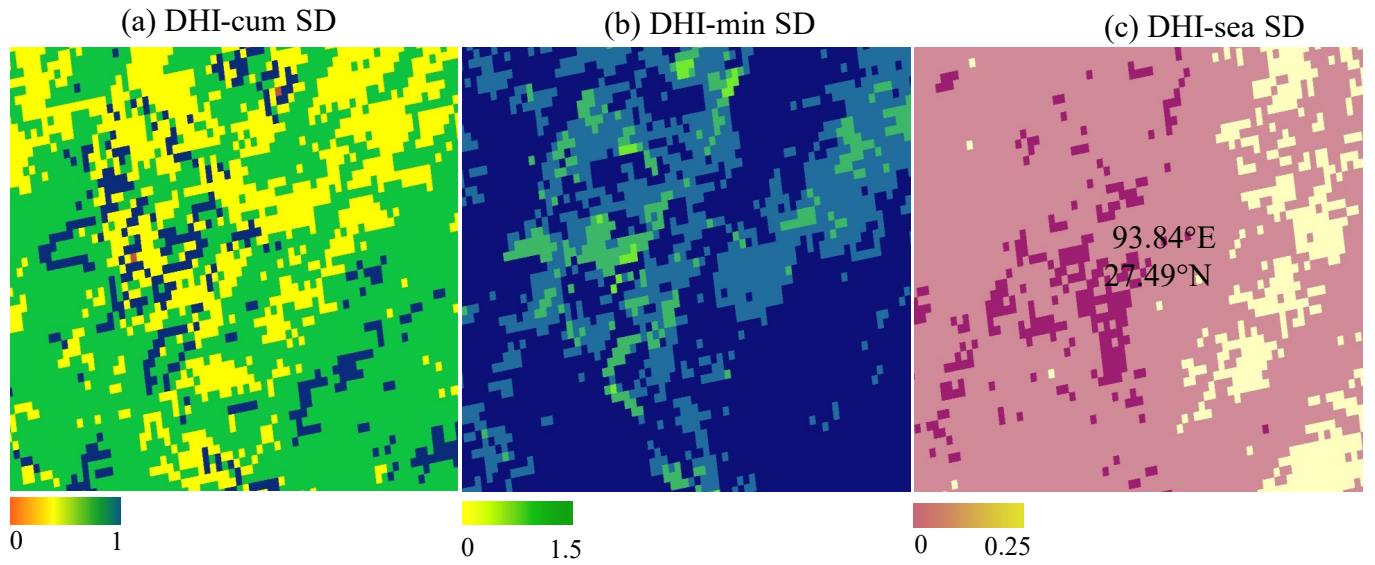

**Figure S1.** A test site (93.84°E, 27.49°N) in Northeastern region demonstrated the variation in greenness cover through the standard deviation of three DHI components during 2001-2015, *i.e.*, (a) DHI-cum SD, (b) DHI-min SD, (c) DHI-sea SD.
